# Supplementary material for: Rare-earth UiO-66 for temperature sensing near room temperature
Source: Royal Society of Chemistry journal article supplement (doi:10.1039/d4tc00781f), 2024-01-01
Supplement: d4tc00781f1.pdf [file d4tc00781f1.pdf]

## Supporting information

### **Rare-earth UiO-66 for temperature sensing near room temperature**

Elias Djanffar,<sup>†a</sup> Hudson A. Bicalho,<sup>†bc</sup> Zvart Ajoyan,<sup>bc</sup> Ashlee J. Howarth<sup>\*bc</sup> and H el ene Serier-Brault<sup>\*a</sup>

a. Nantes Universit e, CNRS, Institut des Mat eriaux de Nantes Jean Rouxel, IMN, F-44000 Nantes, France.

b. Department of Chemistry and Biochemistry and Centre of NanoScience Research, Concordia University, 7141 Sherbrooke Street West, Montr eal, Quebec H4B 1R6, Canada.

E-mail: ashlee.howarth@concordia.ca

c. FRQNT Quebec Centre for Advanced Materials (QCAM/CQMF), Montreal, Canada

E-mail : helene.brault@cnsr-imn.fr

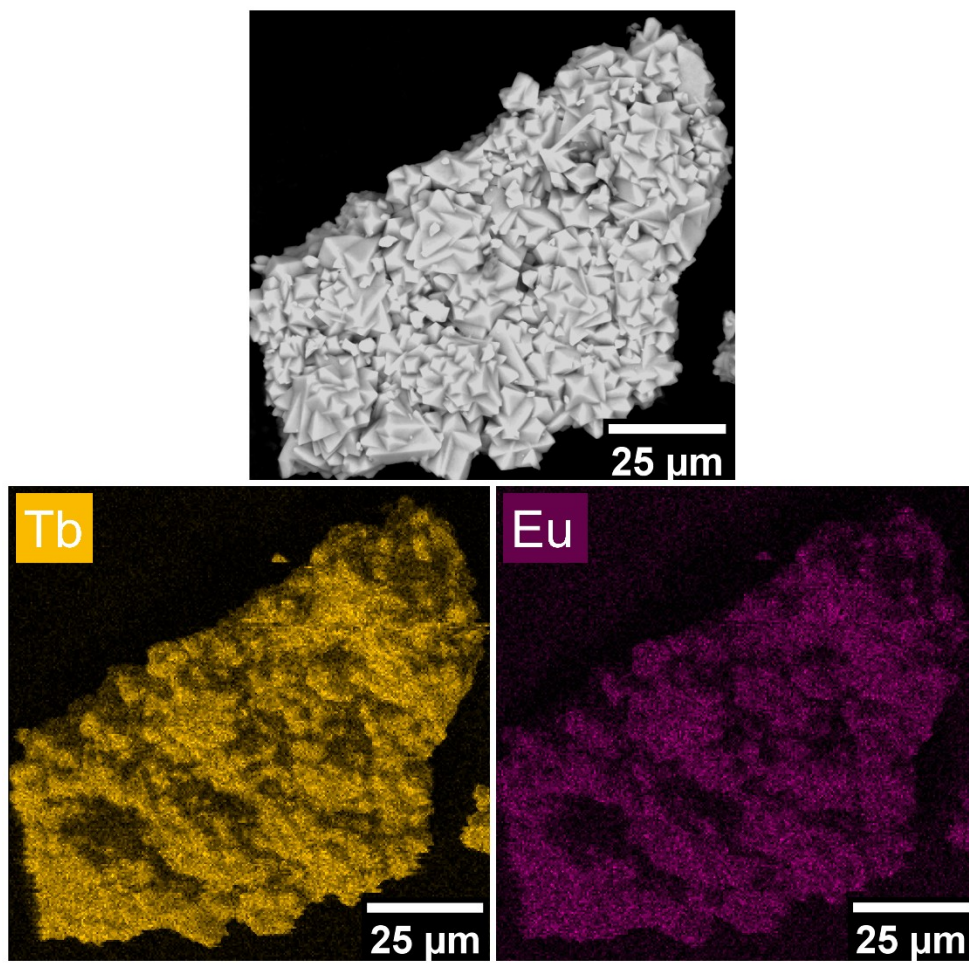

**Figure S1.** Scanning electron microscopy (SEM) image and elemental mapping of Tb and Eu for  $\text{Tb}_{5.94}\text{Eu}_{0.06}\text{-UiO-66}$ .

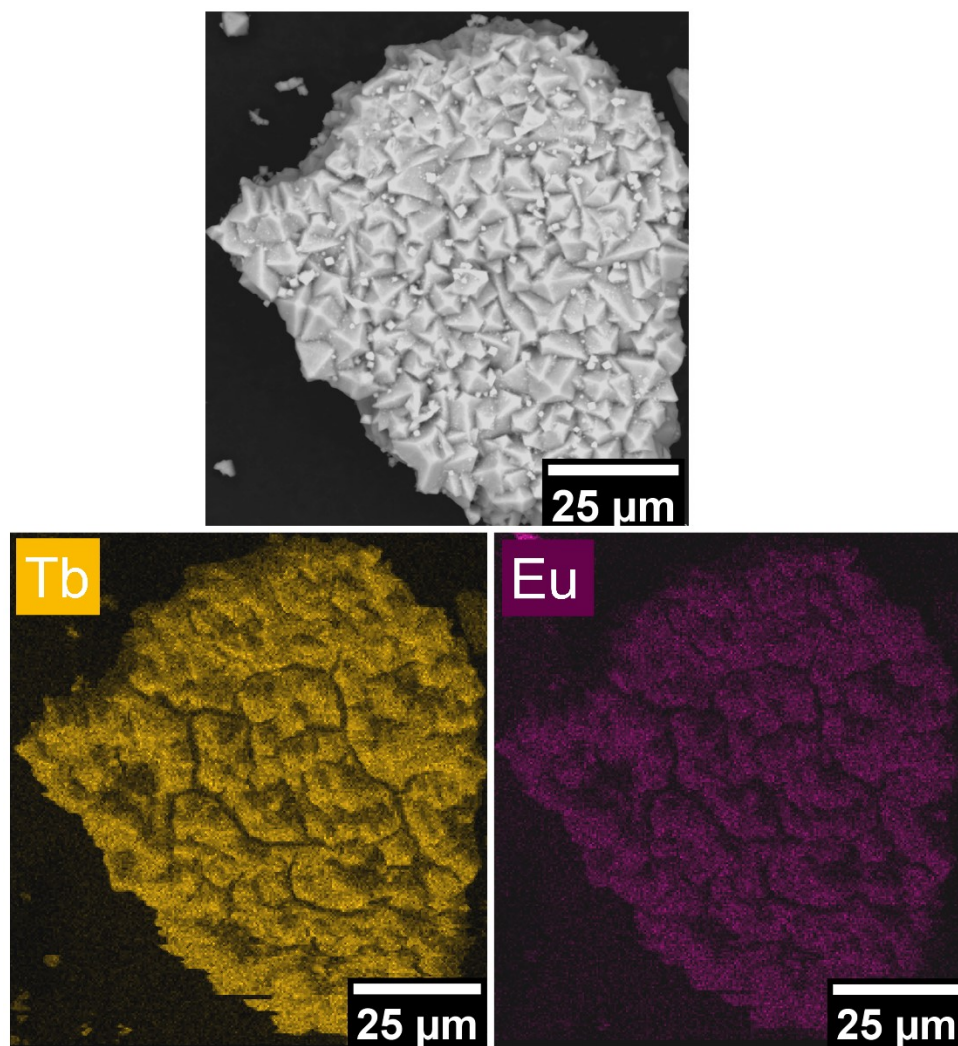

**Figure S2.** Scanning electron microscopy (SEM) image and elemental mapping of Tb and Eu for  $\text{Tb}_{5.82}\text{Eu}_{0.18}\text{-UiO-66}$ .

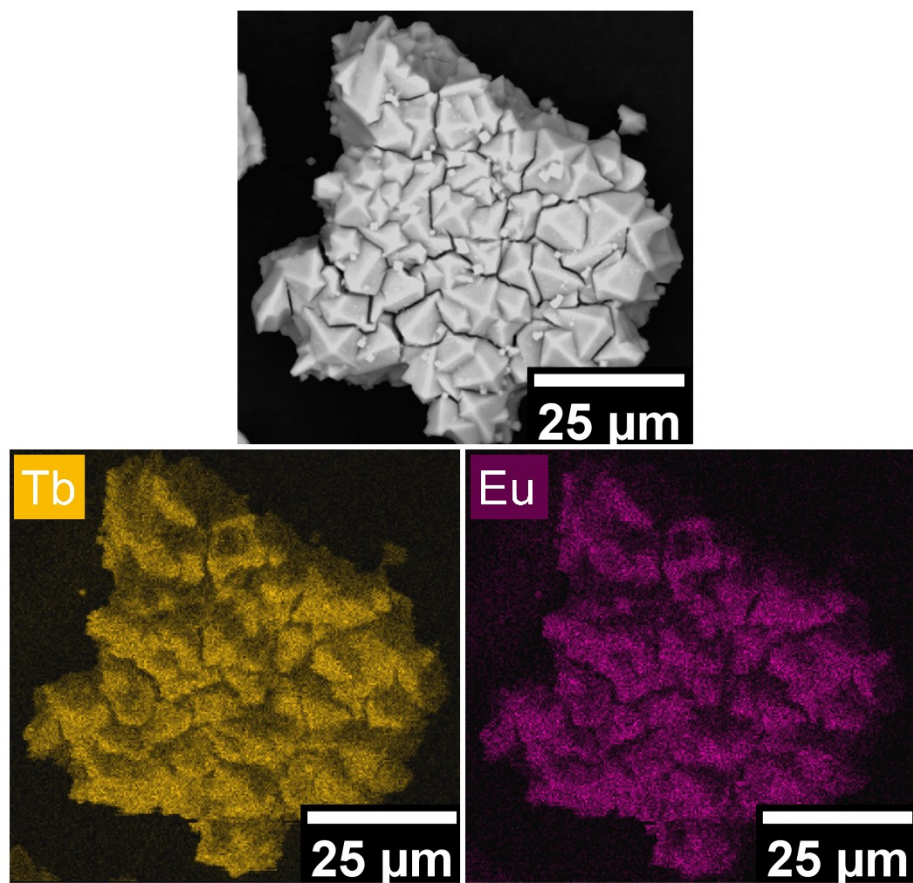

**Figure S3.** Scanning electron microscopy (SEM) image and elemental mapping of Tb and Eu for  $\text{Tb}_{5.58}\text{Eu}_{0.42}\text{-UiO-66}$ .

**Table S1:** EDS and ICP composition of the compounds **Tb<sub>6-x</sub>Eu<sub>x</sub>-UiO-66**.

| Theoretical composition                       | EDS composition                                                     | ICP composition                          |
|-----------------------------------------------|---------------------------------------------------------------------|------------------------------------------|
| Tb <sub>5.94</sub> Eu <sub>0.06</sub> -UiO-66 | 98.86% (Tb) and 1.14% (Eu)<br>Tb <sub>5.94</sub> Eu <sub>0.07</sub> | 99.06 ± 0.12% (Tb) and 0.94 ± 0.12% (Eu) |
| Tb <sub>5.82</sub> Eu <sub>0.18</sub> -UiO-66 | 97.09% (Tb) and 2.91% (Eu)<br>Tb <sub>5.82</sub> Eu <sub>0.18</sub> | 97.43 ± 0.04% (Tb) and 2.57 ± 0.04% (Eu) |
| Tb <sub>5.58</sub> Eu <sub>0.42</sub> -UiO-66 | 93.03% (Tb) and 6.97%(Eu)<br>Tb <sub>5.58</sub> Eu <sub>0.42</sub>  | 93.99 ± 0.14% (Tb) and 6.01 ± 0.14% (Eu) |

**Table S2.** Chromaticity coordinates of compounds **Tb<sub>6-x</sub>Eu<sub>x</sub>-UiO-66** excited at 296 nm.

| Compound                                      | (x;y) coordinates |
|-----------------------------------------------|-------------------|
| Tb-UiO-66                                     | (0.358 ; 0.582)   |
| Tb <sub>5.94</sub> Eu <sub>0.06</sub> -UiO-66 | (0.360 ; 0.559)   |
| Tb <sub>5.82</sub> Eu <sub>0.18</sub> -UiO-66 | (0.399 ; 0.536)   |
| Tb <sub>5.58</sub> Eu <sub>0.42</sub> -UiO-66 | (0.465 ; 0.498)   |

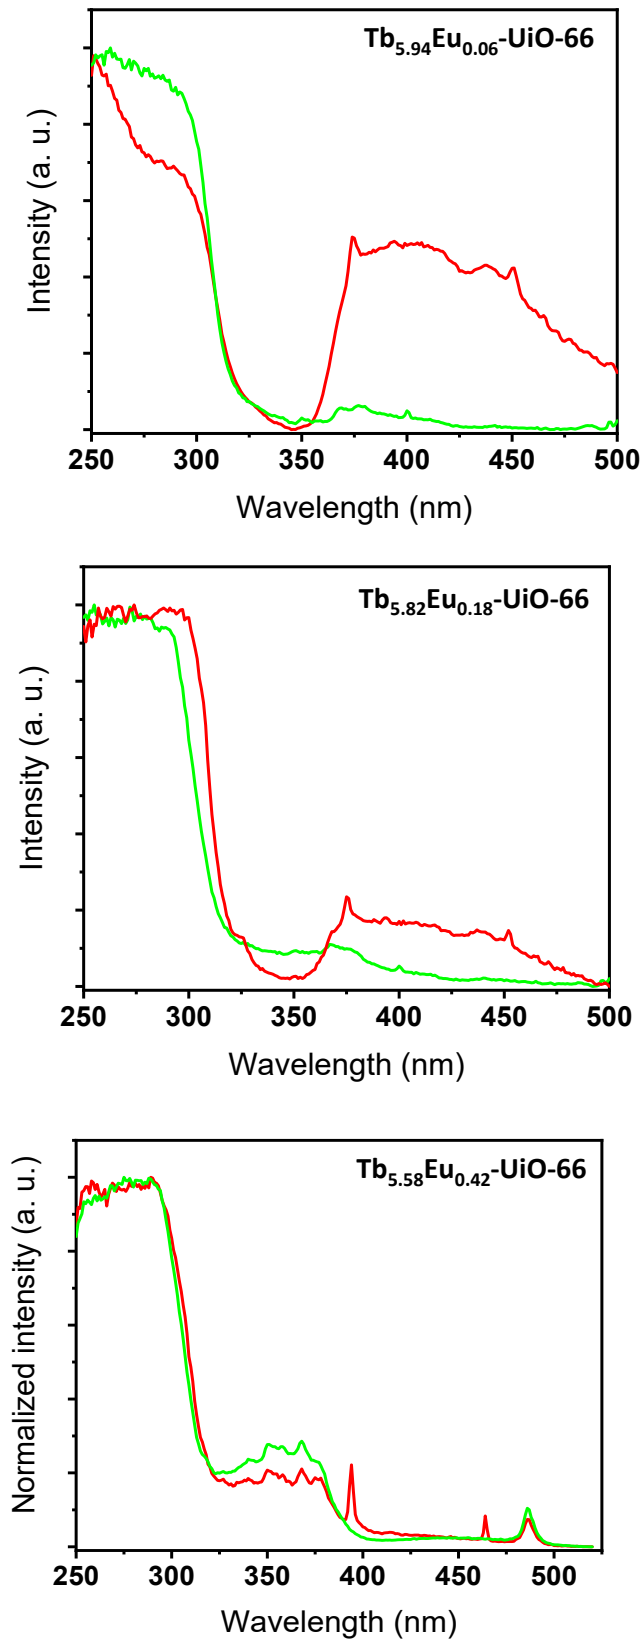

**Figure S4.** Room temperature excitation spectra of monitoring at 614 nm ( ${}^5\text{D}_0 \rightarrow {}^7\text{F}_2$  transition of  $\text{Eu}^{3+}$ , red line) and at 544 nm ( ${}^5\text{D}_4 \rightarrow {}^7\text{F}_5$  transition of  $\text{Tb}^{3+}$ , green line) of  $\text{Tb}_{6-x}\text{Eu}_x\text{-UiO-66}$  materials.

**Table S3.** Room temperature lifetimes of  $^5D_4$  ( $Tb^{3+}$ ) and  $^5D_0$  ( $Eu^{3+}$ ) obtained from the decay curve fitting with a single exponential model.

| Compound                     | $^5D_4$ ( $\mu s$ ) | $^5D_0$ ( $\mu s$ ) |
|------------------------------|---------------------|---------------------|
| Tb-UiO-66                    | $1212 \pm 9$        | ##                  |
| $Tb_{5.94}Eu_{0.06}$ -UiO-66 | $1850 \pm 40$       | $1516 \pm 2$        |
| $Tb_{5.82}Eu_{0.18}$ -UiO-66 | $1540 \pm 20$       | $1850 \pm 10$       |
| $Tb_{5.58}Eu_{0.42}$ -UiO-66 | $1520 \pm 20$       | $1303 \pm 2$        |

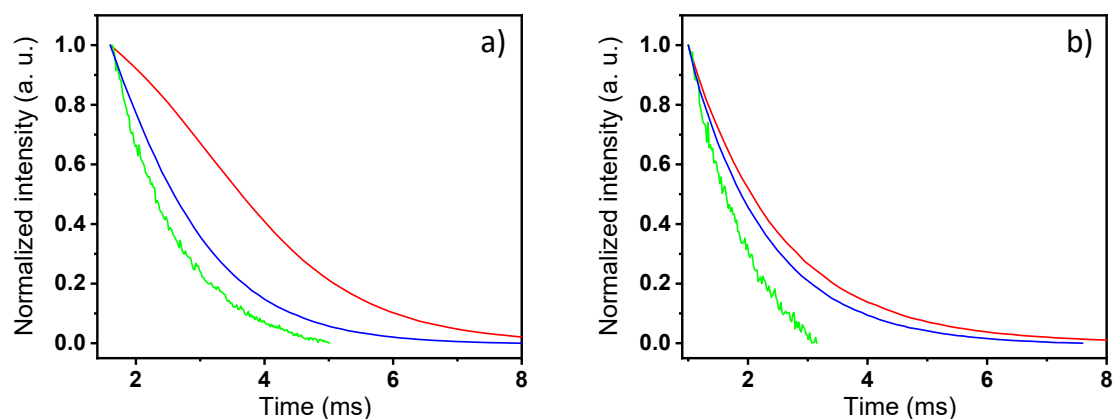

**Figure S5.** a) Decay curves of the  $^5D_4 \rightarrow ^7F_5$  transition of  $Tb^{3+}$  in  $Tb_{5.94}Eu_{0.06}$ -UiO-66 (red line),  $Tb_{5.82}Eu_{0.18}$ -UiO-66 (green line), and  $Tb_{5.58}Eu_{0.42}$ -UiO-66 (blue line), b) Decay curves of the  $^5D_0 \rightarrow ^7F_2$  transition of  $Eu^{3+}$  in  $Tb_{5.94}Eu_{0.06}$ -UiO-66 (red line),  $Tb_{5.82}Eu_{0.18}$ -UiO-66 (green line), and  $Tb_{5.58}Eu_{0.42}$ -UiO-66 (blue line)

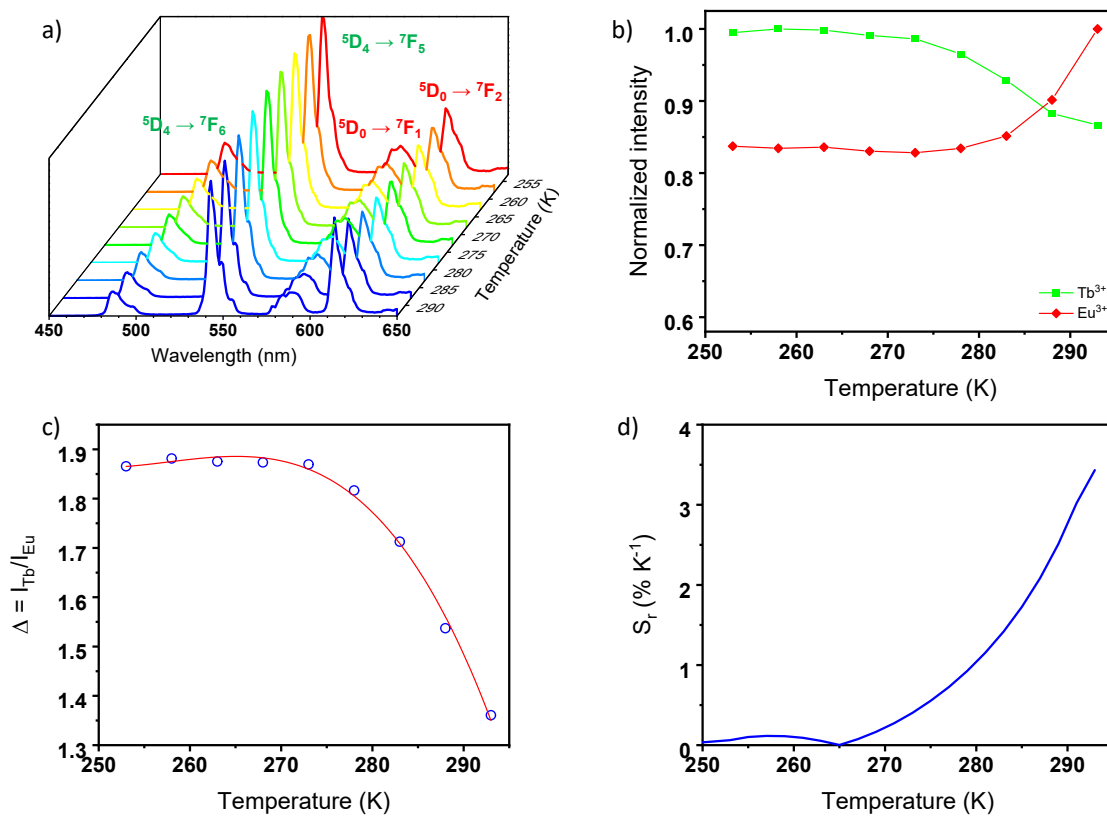

**Figure S6.** a) Temperature-dependent emission spectra in the 255-295 K range of Tb<sub>0.82</sub>Eu<sub>0.18</sub>-UiO-66 upon 296 nm excitation. b) Corresponding dependence of the normalized integrated areas of  $I_{Tb}$  ( $^5D_4 \rightarrow ^7F_5$ ) and  $I_{Eu}$  ( $^5D_0 \rightarrow ^7F_2$ ). c) Temperature dependence of the thermometric parameter  $\Delta = I_{Tb}/I_{Eu}$ , and d) Relative thermal sensitivity for the mixed compound.



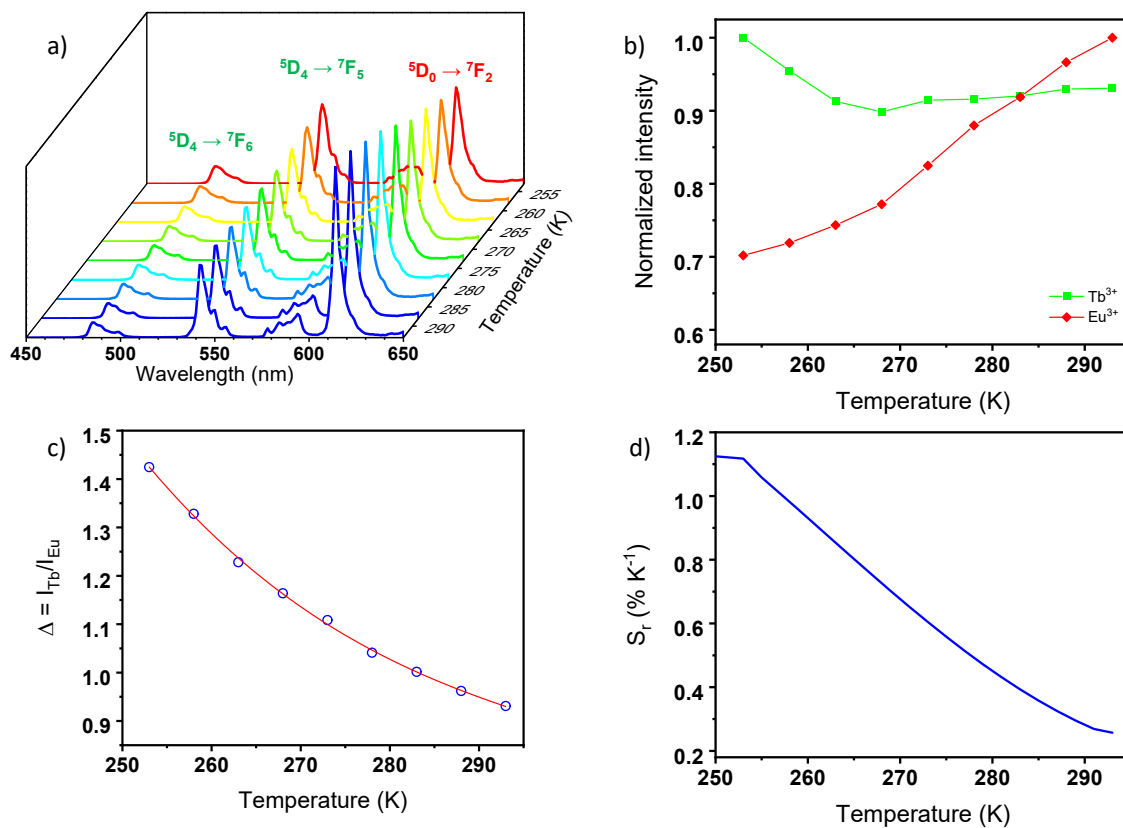

**Figure S7.** a) Temperature-dependent emission spectra in the 255–295 K range of  $\text{Tb}_{5.58}\text{Eu}_{0.42}\text{-UiO-66}$  upon 296 nm excitation. b) Corresponding dependence of the normalized integrated areas of  $I_{\text{Tb}}$  ( ${}^5\text{D}_4 \rightarrow {}^7\text{F}_5$ ) and  $I_{\text{Eu}}$  ( ${}^5\text{D}_0 \rightarrow {}^7\text{F}_2$ ). c) Temperature dependence of the thermometric parameter  $\Delta = I_{\text{Tb}}/I_{\text{Eu}}$ , and d) Relative thermal sensitivity for the mixed compound.

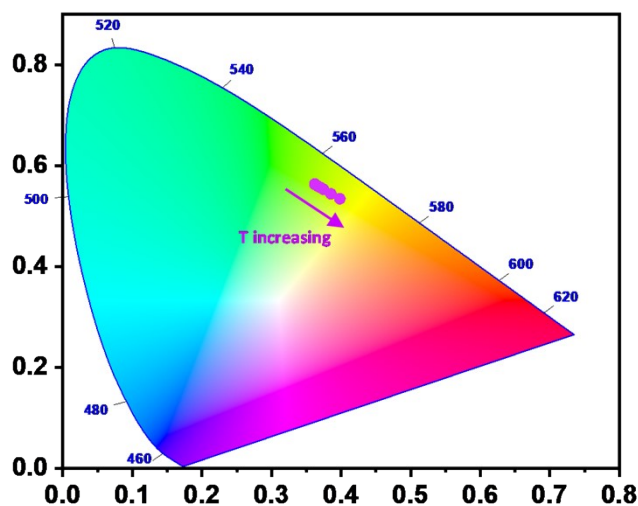

**Figure S8.** Thermal evolution of CIE chromaticity diagram of the  $\text{Tb}_{5.94}\text{Eu}_{0.06}\text{-UiO-66}$  samples calculated from emission spectra between 255 and 295 K.

**Table S4.** Fitting parameters (A, B, C, and D) of calibrations curves  $\Delta = f(T)$  according the following mathematical model :

$$\Delta = A + BT + CT^2 + DT^3$$

|                                               | A         | B          | C             | D                                             | R <sup>2</sup> |
|-----------------------------------------------|-----------|------------|---------------|-----------------------------------------------|----------------|
| Tb <sub>5.94</sub> Eu <sub>0.06</sub> -UiO-66 | 239 ± 148 | -2.9 ± 1.6 | 0.012 ± 0.006 | -1.6.10 <sup>-5</sup> ± 0.7. 10 <sup>-5</sup> | 0.997          |
| Tb <sub>5.82</sub> Eu <sub>0.18</sub> -UiO-66 | 235 ± 64  | -2.7 ± 0.6 | 0.010 ± 0.002 | -1.4.10 <sup>-5</sup> ± 0.3. 10 <sup>-5</sup> | 0.993          |
| Tb <sub>5.58</sub> Eu <sub>0.42</sub> -UiO-66 | 60 ± 27   | -0.6 ± 0.3 | 0.002 ± 0.001 | -2.10 <sup>-6</sup> ± 1.10 <sup>-6</sup>      | 0.999          |

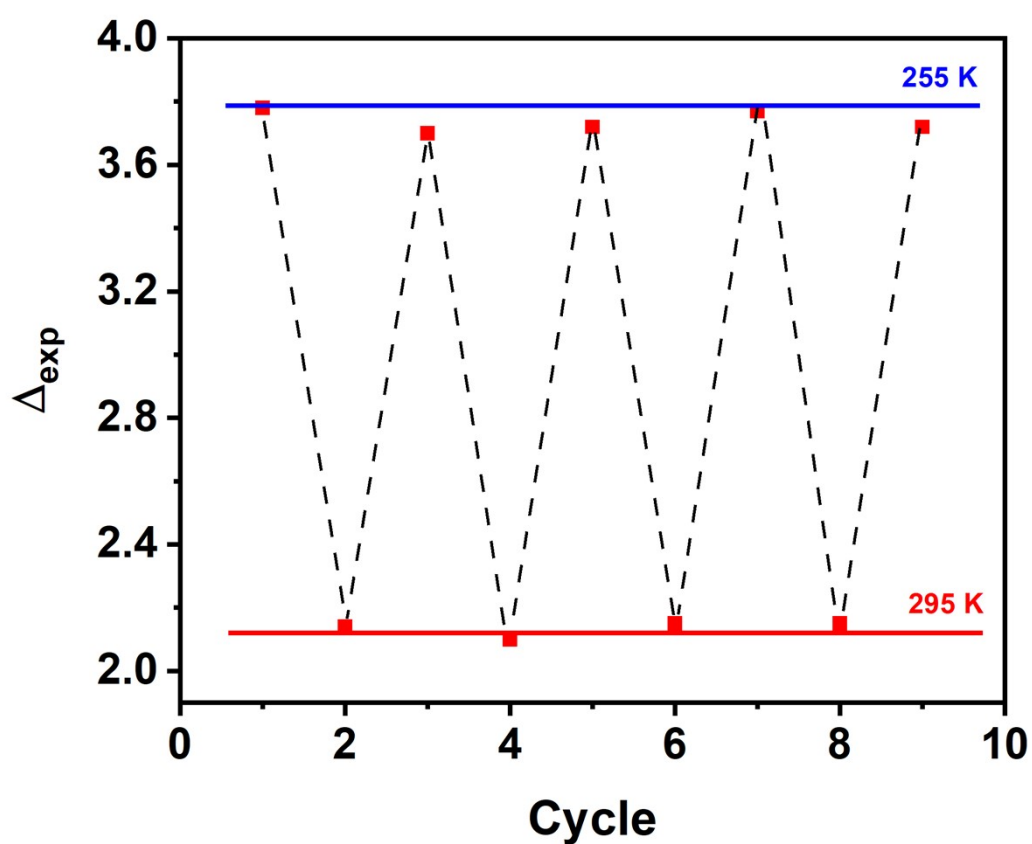

**Figure S9:** Temperature cycling between 255 and 295 K revealing a repeatability > 95% for the Tb<sub>5.94</sub>Eu<sub>0.06</sub>-UiO-66 compound.
